# Supplementary material for: Factors associated with seizure and cognitive outcomes after epilepsy surgery for low-grade epilepsy-associated neuroepithelial tumors in children
Source: PubMed Central journal article supplement — Clin Exp Pediatr. 2019 Nov 13;63(5):171–7. doi: 10.3345/kjp.2019.01151 (PMC7254172; doi:10.3345/kjp.2019.01151), 2019-11-13
Supplement: kjp-2019-01151-suppl1.pdf [file kjp-2019-01151-suppl1.pdf]

**Supplementary Table 1. Detailed summary of literatures on factors associated with seizure outcome in epilepsy surgery of low-grade epilepsy-associated neuroepithelial tumors**

| Study                          | No. of patients                                        | Types of tumor (percent)                                                                                                                                                        | Parameters for seizure outcome                                                                                                                                                                                                                 | Factors associated with poor seizure outcome                                                                                                                | Factors irrelevant to seizure outcome                                                                                                                                                                                                                                                                                                                                                                                                                                                                                                                                                                    |
|--------------------------------|--------------------------------------------------------|---------------------------------------------------------------------------------------------------------------------------------------------------------------------------------|------------------------------------------------------------------------------------------------------------------------------------------------------------------------------------------------------------------------------------------------|-------------------------------------------------------------------------------------------------------------------------------------------------------------|----------------------------------------------------------------------------------------------------------------------------------------------------------------------------------------------------------------------------------------------------------------------------------------------------------------------------------------------------------------------------------------------------------------------------------------------------------------------------------------------------------------------------------------------------------------------------------------------------------|
| Babini et al. (2013)           | 30                                                     | GG (66.7%), DNT (13.3%), PXA (6.7%), Gangliocytoma (3.3%), Angiocentric glioma (3.3%), Papillary GNT (3.3%), Extraventricular neurocytoma (3.3%)                                | Good: Engel class I (n=26, 86.7%)<br>Poor: Engel class II-III (n=4, 13.3%), at last f/u, f/u duration of mean 7.1 years (range, 1-17 years)                                                                                                    | Younger age at sz onset<br>≤4 years at sz onset<br>Tailored surgery in temporal lobe tumors                                                                 | Age at surgery, duration of epilepsy, secondary generalization, sz frequency before surgery, location of tumor, side of tumor location                                                                                                                                                                                                                                                                                                                                                                                                                                                                   |
| Brahimaj et al. (2014)         | 18                                                     | DNT (27.8%), PXA (16.7%), GG (11.1%), Desmoplastic GG (11.1%), Low-grade glioma (11.1%), Pilocytic astrocytoma (11.1%), Oligodendroglioma (5.6%), Fibrillary astrocytoma (5.6%) | Good: sz free (n=8, 44.4%)<br>Poor: persistent sz (n=10, 55.6%), at last f/u, mean f/u duration of 39 months (minimum, 6 months)                                                                                                               | Greater number of AEDs tried before surgery                                                                                                                 | Age at sz onset, age at surgery, gender, contralateral ED on EEG, extent of resection                                                                                                                                                                                                                                                                                                                                                                                                                                                                                                                    |
| Daszkiewicz et al. (2018)      | 52                                                     | GG (92.3%), DNT (7.7%) (tumors located in mesial-basal part of the temporal lobe were included)                                                                                 | Good: Engel class I (n=45, 86.5%)<br>Poor: Engel class II-III (n=7, 13.5%), at last f/u, f/u duration of mean 2.9 years (range, 1-7 years)                                                                                                     | Age > 6 years at surgery<br>Duration of epilepsy > 1 year                                                                                                   | Extent of tumor, coexistence of cortical dysplasia, surgical approach, extent or resection                                                                                                                                                                                                                                                                                                                                                                                                                                                                                                               |
| Ehrstedt et al. (2017)         | 25                                                     | GG, DNT, Infantile desmoplastic GG (proportions unknown)                                                                                                                        | Good: Engel class I (n=45, 86.5%)<br>Poor: Engel class II-III (n=7, 13.5%), at last f/u, f/u duration of mean 2.9 years (range, 1-7 years)                                                                                                     | STR                                                                                                                                                         | Age at sz onset, gender, duration of epilepsy, drug-resistant epilepsy before surgery, tumor location                                                                                                                                                                                                                                                                                                                                                                                                                                                                                                    |
| Faramand et al. (2017)         | 92                                                     | DNT, GG, Demoplastic GG, Angiocentric glioma, GNT not specified (proportions unknown)                                                                                           | Good: Engel class I (n=74, 80.4%)<br>Poor: Engel class II-IV (n=18, 19.6%) at last f/u, f/u duration of ≥12 months                                                                                                                             | STR                                                                                                                                                         | Age at sz onset, age at first assessment, age at surgery, gender, duration of epilepsy, secondary generalization, tumor location, side of tumor location, tumor type                                                                                                                                                                                                                                                                                                                                                                                                                                     |
| García-Fernández et al. (2011) | 21                                                     | GG (47.6%), DNT (42.9%), Gangliocytoma (9.5%)                                                                                                                                   | Good: sz free (n=18, 85.7%)<br>Poor: persistent sz (n=3, 14.3%), at last f/u, f/u duration of mean 4.68 years (SD, 2.13; minimum, 1 year)                                                                                                      | STR                                                                                                                                                         | Age at sz onset, age at surgery, duration of epilepsy, tumor location, side of tumor location, type of tumor, drug-resistant epilepsy, number of interictal epileptogenic foci on EEG, interictal ED on EEG, extent of resection                                                                                                                                                                                                                                                                                                                                                                         |
| Khajavi et al. (1995)          | 15                                                     | GG (100%)                                                                                                                                                                       | Good: sz free or ≥90% sz reduction (n=12, 80.0%)<br>Poor: <90% sz reduction (n=3, 20.0%), at last f/u, f/u duration mean 42 months (range, 18-107 months)                                                                                      | STR                                                                                                                                                         | Extended resection of epileptogenic foci utilizing iEEG                                                                                                                                                                                                                                                                                                                                                                                                                                                                                                                                                  |
| Khajavi et al. (1999)          | 34                                                     | GG (44.1%), DNT (20.6%), Low-grade astrocytoma (20.6%), Oligodendroglioma (11.8%), Mixed glioma (2.9%)                                                                          | Good: sz free or ≥90% sz reduction (n=29, 85.3%)<br>Poor: <90% sz reduction (n=5, 14.7%), at last f/u, f/u duration mean 43 months (range, 18-126 months)                                                                                      | Older age at surgery<br>STR                                                                                                                                 | uration of epilepsy, sz frequency before surgery, tumor type, location of tumor,                                                                                                                                                                                                                                                                                                                                                                                                                                                                                                                         |
| Ko et al. (2019)               | 58                                                     | GG (46.6%), DNT (48.3%), Pilocytic astrocytoma (3.4%), Papillary glioneuronal tumor (1.7%)                                                                                      | Good: sz free (n=51, 87.9%)<br>Poor: persistent sz (n=7, 12.1%), at last f/u, f/u duration of median 5.6 years (IQR, 3.2-10.0; minimum, 2 years)                                                                                               | Univariate:<br>-Longer duration of epilepsy<br>-Greater number of AEDs taken before surgery<br>-STR<br>-Temporal location of tumor<br>Multivariate:<br>-STR | Age at seizure onset, gender, f/u duration, sz frequency before surgery, sz semiology, drug-resistant epilepsy, duration of video EEG monitoring, generalized ED on EEG, side of tumor location, iEEG monitoring, tumor type, associated FCD                                                                                                                                                                                                                                                                                                                                                             |
| Minkin et al. (2008)           | 24                                                     | DNT (100%)                                                                                                                                                                      | Good: Engel class I (n=20, 83.3%)<br>Poor: Engel class II-III (n=4, 16.7%), at last f/u, f/u duration of mean 6.7 years (range, 1-16 years)                                                                                                    | Presence of generalized sz                                                                                                                                  | Age at sz onset, age at surgery, gender, EEG concordancy, pathology (simple/complex/nonspecific), malformation of cortical development, f/u duration                                                                                                                                                                                                                                                                                                                                                                                                                                                     |
| Nolan et al. (2004)            | 26                                                     | DNT (100%)                                                                                                                                                                      | Good: sz free (n=22, 84.6%)<br>Poor: persistent sz (n=4, 15.4%), at 12 months after surgery<br><br>Good: sz free (n=16, 61.5%)<br>Poor: persistent sz (n=10, 38.5%), at last f/u, f/u duration of mean 4.3 years (SD, 2.5; range, 1-11 years)  | Duration of epilepsy >2 years<br>Age at surgery >10 years<br>STR<br><br>STR                                                                                 | Age at sz onset, gender, presence of developmental delay, presence of focal neurological deficit, sz semiology, MRI appearance of tumor (typical/atypical/enhanced), utilization of ECoG, pathologic classification of DNT (simple/complex/unclassified), presence of cortical dysplasia<br><br>Age at sz onset, gender, duration of epilepsy, age at surgery, presence of developmental delay, presence of focal neurological deficit, sz semiology, MRI appearance of tumor (typical/atypical/enhanced), utilization of ECoG, pathologic classification of DNT (simple/complex/unclassified), presence |
| Ogiwara et al. (2010)          | 30                                                     | GG (100%)                                                                                                                                                                       | Good: Engel class I (n=27, 90.0%)<br>Poor: Engel class II (n=3, 10.0%), at last f/u, f/u duration of mean 3.4 years (range 1 month-8.2 years)                                                                                                  | None                                                                                                                                                        | Age at surgery, gender, tumor location, extent of resection, utilization of intraoperative ECoG                                                                                                                                                                                                                                                                                                                                                                                                                                                                                                          |
| Packer et al. (1994)           | 60 (≥1 sz before surgery)<br>50 (≥5 sz before surgery) | GG (68.3%), Low-grade glioma (18.3%), PXA (6.7%), Intermediate-grade glioma (3.3%), Mixed low-grade glioma (3.3%)                                                               | Good: sz free or ≥75% sz reduction (n=47, 78.3%)<br>Poor: <75% sz reduction (n=13, 21.7%), at 2 years after surgery<br><br>Good: sz free or ≥75% sz reduction (n=38, 76.0%)<br>Poor: <75% sz reduction (n=12, 24.0%), at 2 years after surgery | Parietal location of tumor<br>STR<br><br>Parietal location of tumor<br>STR<br>Duration of epilepsy >1 year                                                  | Age at surgery, duration of epilepsy, sz semiology, sz frequency before surgery, tumor type<br><br>Age at surgery, sz semiology, sz frequency before surgery, tumor type                                                                                                                                                                                                                                                                                                                                                                                                                                 |
| Ramantani et al. (2014)        | 29                                                     | GG (55.2%), DNT (44.8%)                                                                                                                                                         | Good: Engel class I (n=22, 75.9%)<br>Poor: Engel class II-IV (n=7, 24.1%), at last f/u, f/u duration of mean 7.3 years (SD, 3.0; range, 1.3-12.3 years)                                                                                        | STR                                                                                                                                                         | Age at onset, age at surgery, duration of epilepsy, generalized sz                                                                                                                                                                                                                                                                                                                                                                                                                                                                                                                                       |
| Ullei-Sibony et al. (2011)     | 41                                                     | Pilocytic astrocytoma (48.8%), GG (29.3%), Low-grade oligodendroglioma (14.6%), DNT (7.3%) (tumors located in temporal lobe were included)                                      | Good: Engel class I (n=34, 82.9%)<br>Poor: Engel class II-IV (n=7, 17.1%), at last f/u, f/u duration of mean 5.3 years (range, 1-13 years)                                                                                                     | Presence of generalized ED on EEG                                                                                                                           | Age at seizure onset, duration of epilepsy, semiology, tumor type, utilization of ECoG, GTR/STR, extent of resection                                                                                                                                                                                                                                                                                                                                                                                                                                                                                     |
| Yang et al. (2019)             | 39                                                     | DNT (100%)                                                                                                                                                                      | Good: sz free (n=26, 66.7%)<br>Poor: persistent sz (n=13, 33.3%), at last f/u, f/u duration of median 92 months (range, 6-155 months)                                                                                                          | Presence of satellite lesions on MRI                                                                                                                        | Age at seizure onset, gender, duration of epilepsy, location of tumor, GTR/STR                                                                                                                                                                                                                                                                                                                                                                                                                                                                                                                           |

GG, ganglioglioma; DNT, dysembryoplastic neuroepithelial tumor; PXA, pleomorphic xanthoastrocytoma; GNT, glioneuronal tumor; f/u, follow-up; sz, seizure; AED, antiepileptic drug; ED, epileptiform discharge; EEG, electroencephalography; STR, subtotal resection; SD, standard deviation; iEEG, invasive subdural electroencephalography; FCD, focal cortical dysplasia; IQR, interquartile range; MRI, magnetic resonance imaging; ECoG, electrocorticography; GTR, gross total resection.  
See the end-reference list in main text for references of the Supplementary Table 1.
