# Supplementary material for: Factors associated with seizure and cognitive outcomes after epilepsy surgery for low-grade epilepsy-associated neuroepithelial tumors in children
Source: PubMed Central journal article supplement — Clin Exp Pediatr. 2019 Nov 13;63(5):171–7. doi: 10.3345/kjp.2019.01151 (PMC7254172; doi:10.3345/kjp.2019.01151), 2019-11-13
Supplement: kjp-2019-01151-suppl2.pdf [file kjp-2019-01151-suppl2.pdf]

**Supplementary Table 2. Detailed summary of literatures on factors associated with cognitive outcome in epilepsy surgery of low-grade epilepsy-associated neuroepithelial tumors**

| Study                          | No. of patients | Types of tumor (%)                                                                                                                       | Parameters for cognitive functions                                                                                                                                                                           | Factors associated with poor cognitive outcome                                                                                                                                                          | Factors irrelevant to cognitive outcome                                                                                                                                                                                                                      |
|--------------------------------|-----------------|------------------------------------------------------------------------------------------------------------------------------------------|--------------------------------------------------------------------------------------------------------------------------------------------------------------------------------------------------------------|---------------------------------------------------------------------------------------------------------------------------------------------------------------------------------------------------------|--------------------------------------------------------------------------------------------------------------------------------------------------------------------------------------------------------------------------------------------------------------|
| Faramand et al. (2017)         | 90              | DNT, GG, Demoplastic GG, Angiocentric glioma, GNT not specified (proportions unknown)                                                    | Preoperative full-scale IQ                                                                                                                                                                                   | Longer duration of epilepsy<br>Younger age at sz onset                                                                                                                                                  | Age at surgery, tumor location                                                                                                                                                                                                                               |
|                                | 41              |                                                                                                                                          | Postoperative full-scale IQ, at 1 year after surgery                                                                                                                                                         | Low preoperative full-scale IQ                                                                                                                                                                          | Age at sz onset, duration of epilepsy, degree of resection                                                                                                                                                                                                   |
| García-Fernández et al. (2011) | 21              | GG (47.6%), DNT (42.9%), Gangliocytoma (9.5%)                                                                                            | Preoperative full-scale IQ, performance IQ, motor function of dominant hand, motor function of non-dominant hand, verbal reasoning, auditory processing, vocabulary recognition, visual learning, arithmetic | Younger age at sz onset<br>Drug-resistant epilepsy                                                                                                                                                      | Tumor location, side of tumor location                                                                                                                                                                                                                       |
|                                |                 |                                                                                                                                          | Preoperative verbal IQ, verbal learning                                                                                                                                                                      | Younger age at sz onset<br>Drug-resistant epilepsy<br>Left hemispheric tumor                                                                                                                            | Side of tumor location                                                                                                                                                                                                                                       |
|                                |                 |                                                                                                                                          | Preoperative vasomotor coordination, visuo-constructional praxis, spatial memory, concept formation                                                                                                          | Younger age at sz onset                                                                                                                                                                                 | Drug-resistant epilepsy, tumor location, side of tumor location                                                                                                                                                                                              |
|                                |                 |                                                                                                                                          | Preoperative delayed verbal recall, reading/understanding                                                                                                                                                    | Drug-resistant epilepsy<br>Left hemispheric tumor                                                                                                                                                       | Age at sz onset, side of tumor location                                                                                                                                                                                                                      |
|                                |                 |                                                                                                                                          | Preoperative visual perception, phonemic and semantic verbal fluency, sustained attention                                                                                                                    | Drug-resistant epilepsy                                                                                                                                                                                 | Age at sz onset, tumor location, side of tumor location                                                                                                                                                                                                      |
|                                |                 |                                                                                                                                          | Preoperative visual perception, phonemic and semantic verbal fluency, sustained attention                                                                                                                    | Extratemporal location of tumor                                                                                                                                                                         | Age at sz onset, drug-resistant epilepsy, side of tumor location                                                                                                                                                                                             |
|                                |                 |                                                                                                                                          | Postoperative improvement in visual attention, auditory processing, verbal comprehension, verbal delayed recall, spatial memory, executive function/nonverbal fluency, at 1 year after surgery               | Extended lesionectomy (compared to extended resection)                                                                                                                                                  | Not mentioned                                                                                                                                                                                                                                                |
| Giulioni et al. (2017)         | Not specified   | GG, DNT, PXA, Pilocytic astrocytoma, Angiocentric glioma, GNT not specified, Low-grade glioma not specified, Mixed (proportions unknown) | Preoperative neuropsychological test (normal vs pathologic)                                                                                                                                                  | Longer duration of epilepsy                                                                                                                                                                             | Not mentioned                                                                                                                                                                                                                                                |
| Ko et al. (2019)               | 58              | GG (46.6%), DNT (48.3%), Pilocytic astrocytoma (3.4%), Papillary glioneuronal tumor (1.7%)                                               | Preoperative full-scale IQ                                                                                                                                                                                   | Univariate:<br>-Longer duration of epilepsy before surgery<br>-Greater number of AEDs taken before surgery<br>-STR<br>-Multilobar involvement of tumor<br>Multivariate:<br>-Longer duration of epilepsy | Age at seizure onset, gender, age at surgery, f/u duration, sz frequency before surgery, sz semiology, drug-resistant epilepsy, duration of video EEG monitoring, generalized ED on EEG, side of tumor location, iEEG monitoring, tumor type, associated FCD |
|                                | 42              |                                                                                                                                          | (proportions unknown)                                                                                                                                                                                        | Postoperative full-scale IQ, at median 21.0 months (IQR, 13.2–31.0 months) after surgery                                                                                                                | Low preoperative full-scale IQ                                                                                                                                                                                                                               |
| Ramantani et al. (2014)        | 25              | GG, DNT (proportions unknown)                                                                                                            | Preoperative full-scale IQ                                                                                                                                                                                   | Longer duration of epilepsy                                                                                                                                                                             | Age at sz onset, age at surgery, sz frequency before surgery, generalized sz                                                                                                                                                                                 |
|                                | 24              |                                                                                                                                          | Postoperative full-scale IQ                                                                                                                                                                                  | Low preoperative full-scale IQ                                                                                                                                                                          | Not mentioned                                                                                                                                                                                                                                                |

GG, ganglioglioma; DNT, dysembryoplastic neuroepithelial tumor; IQ, intelligence quotient; sz, seizure; GNT, glioneuronal tumor; PXA, pleomorphic xanthoastrocytoma; ED, epileptiform discharge; iEEG, invasive subdural electroencephalography; FCD, focal cortical dysplasia; IQR, interquartile range.

See the end-reference list in main text for references of the Supplementary Table 2.
